# Supplementary material for: Formulation and Characterization of Quercetin-loaded Oil in Water Nanoemulsion and Evaluation of Hypocholesterolemic Activity in Rats
Source: MDPI journal article supplement (doi:10.3390/nu11020244), 2019-01-22
Supplement: s1 [file s1]

**Table S1.** Compositions of experimental diets (units: g/kg diet).

| Component                | HC    | LQ    | HQ    | LNQ   | HNQ   |
|--------------------------|-------|-------|-------|-------|-------|
| Corn starch              | 150.0 | 150.0 | 150.0 | 150.0 | 150.0 |
| Casein                   | 200.0 | 200.0 | 200.0 | 200.0 | 200.0 |
| Sucrose                  | 485.0 | 484.5 | 484.0 | 484.5 | 484.0 |
| Corn oil                 | 50.0  | 50.0  | 50.0  | 50.0  | 50.0  |
| Cellulose                | 50.0  | 50.0  | 50.0  | 50.0  | 50.0  |
| Mineral mix <sup>a</sup> | 35.0  | 35.0  | 35.0  | 35.0  | 35.0  |
| Vitamin mix <sup>b</sup> | 10.0  | 10.0  | 10.0  | 10.0  | 10.0  |
| DL-Methionine            | 3.0   | 3.0   | 3.0   | 3.0   | 3.0   |
| Choline bitartrate       | 2.0   | 2.0   | 2.0   | 2.0   | 2.0   |
| Experimental Powder      | 0.0   | 0.5   | 1.0   | 0.5   | 1.0   |
| Cholesterol              | 10.0  | 10.0  | 10.0  | 10.0  | 10.0  |
| Cholic acid              | 5.0   | 5.0   | 5.0   | 5.0   | 5.0   |
| Total                    | 1,000 | 1,000 | 1,000 | 1,000 | 1,000 |
| Total Calorie (kcal)     | 3,714 | 3,712 | 3,710 | 3,712 | 3,710 |
| Carbohydrate (% as kcal) | 66.8  | 66.8  | 66.7  | 66.8  | 66.7  |
| Protein (% as kcal)      | 19.6  | 19.6  | 19.6  | 19.6  | 19.6  |
| Fat (% as kcal)          | 12.1  | 12.1  | 12.1  | 12.1  | 12.1  |

HC: high cholesterol diet containing 1% cholesterol and 0.5% cholic acid, LQ: HC containing 0.05% quercetin, HQ: HC containing 0.1% quercetin, LNQ: HC containing 0.05% quercetin nanomeulsion, HNQ: HC containing 0.1% quercetin nanoemulsion.

Experimental diets were transformed based on the AIN -76 diet composition.

<sup>a</sup> AIN-76 Mineral mix.

<sup>b</sup> AIN-76 Vitamin mix.

**Table S2.** Primers used for real-time qPCR.

| Name           | Genbank No. | Primer sequence (5' - 3')                           | Amplicon size (bp) |
|----------------|-------------|-----------------------------------------------------|--------------------|
| ABCG5          | NM_053754   | F: ATGAGTGAGCTGCCCTTTCT<br>R: CGCTGAAGGACACATTCAGG  | 142                |
| ABCG8          | NM_130414   | F: GAGAACTTTGTCCCGCCTGG<br>R: AGATAGGGGTGCCAGACGTC  | 122                |
| $\beta$ -actin | NM_031144   | F: GGCACCACACTTTCTACAAT<br>R: AGGTCTCAAACATGATCTGG  | 123                |
| CYP7A1         | NM_012942   | F: TGTTCCTGTGTTCACTTTCTG<br>R: ACTCGGTAACAGAAGGCATA | 126                |
| LXR $\alpha$   | NM_031627   | F: GACTTCGAGTCACGCCTTGG<br>R: GTCCTCCCTGCTCAGCTGTA  | 161                |

ABCG5, ATP-binding cassette sub-family G member 5; ABCG8, ATP-binding cassette sub-family G member 8; CYP7A1, Cholesterol 7  $\alpha$ -hydroxylase; LXR $\alpha$ , liver X receptor  $\alpha$ .

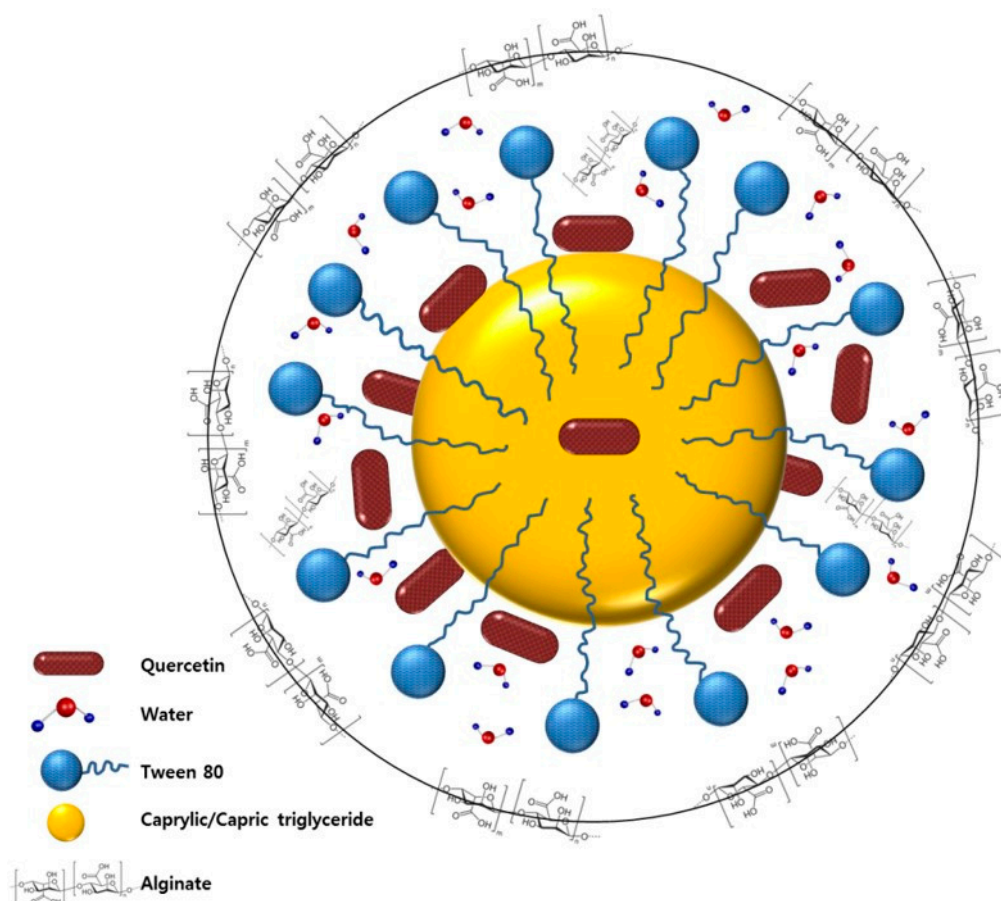

**Figure S1.** Schematic illustration of possible incorporation of quercetin in oil-in-water nanoemulsion.

**A**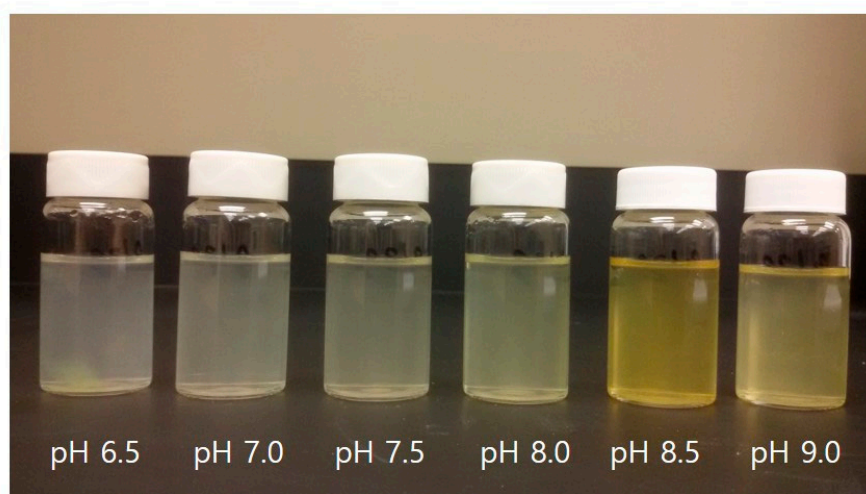**B**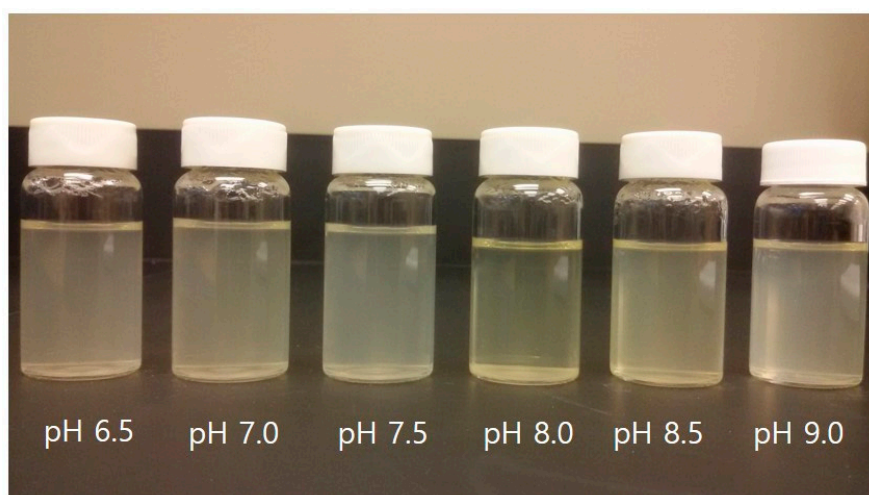

**Figure S2.** Visual appearance of quercetin-loaded nanoemulsions at (A) 21 °C and (B) 37 °C for 3 month storage.

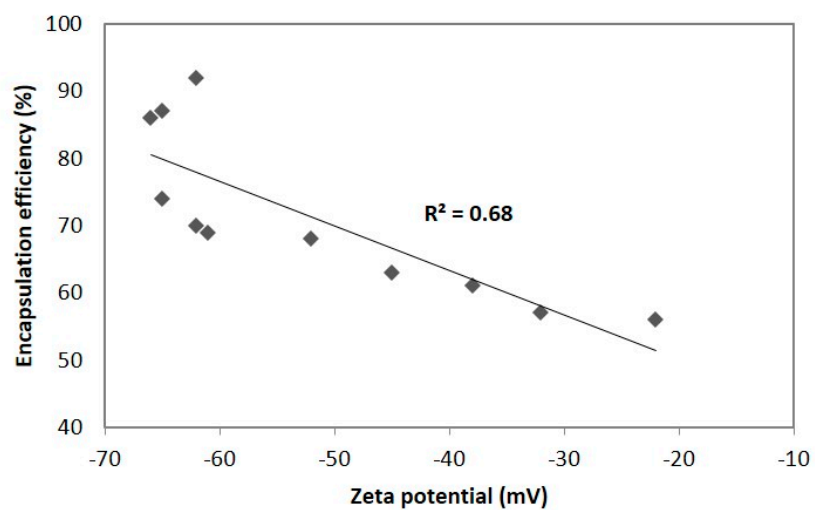

**Figure S3.** Correlation between zeta potential and encapsulation efficiency for quercetin-loaded nanoemulsions.

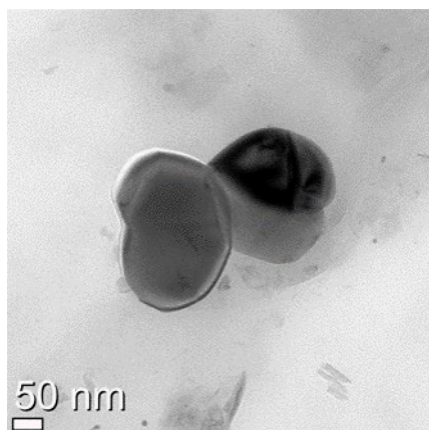

**Figure S4.** Transmission electron microscope image of quercetin nanomeulsion used in animal study (scale bar = 50 nm).

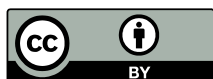

© 2018 by the authors. Submitted for possible open access publication under the terms and conditions of the Creative Commons Attribution (CC BY) license (<http://creativecommons.org/licenses/by/4.0/>).
